# Supplementary material for: An uncoordinated tertiary nitrogen based tricarboxylate calcium network with Lewis acid–base dual catalytic sites for cyanosilylation of aldehydes
Source: Royal Society of Chemistry journal article supplement (doi:10.1039/d0dt03747h), 2020-12-25
Supplement: d0dt03747h1.pdf [file d0dt03747h1.pdf]

## Supporting Information

### **An uncoordinated tertiary nitrogen based tricarboxylate Calcium network with Lewis acid-base dual catalytic sites for cyanosilylation of aldehydes**

Ying-Xia Wang<sup>#</sup>, Hui-Min Wang<sup>#</sup>, Pan Meng, Dong-Xia Song, Juan-Juan Hou and  
Xian-Ming Zhang\*

#### **Contents**

|                                                          |     |
|----------------------------------------------------------|-----|
| 1. General Information .....                             | S2  |
| 2. Crystal Structure Data of <b>1</b> .....              | S3  |
| 3. Physical Characterizations of <b>1</b> .....          | S5  |
| 4. Stability Study of <b>1</b> .....                     | S6  |
| 5. Gas Adsorption of <b>1</b> .....                      | S7  |
| 6. Catalytic Results .....                               | S9  |
| 7. Catalytic Procedure .....                             | S13 |
| 8. Chemical Stability of <b>1</b> During Catalysis ..... | S15 |
| 9. Characterization of Products .....                    | S16 |

## 1. General Information

All reagents were purchased from Energy Chemical and used without further purification.  $^1\text{H}$  NMR and  $^{13}\text{C}$  NMR were recorded on Bruker Avance III DM 600 MHz. IR spectrum on KBr pellet was obtained using a Nicolet iS50 spectrometer in the region of 4000-400  $\text{cm}^{-1}$ . ~~UV-vis spectrum were tested on UV 25500 UV/vis/near-IR spectrophotometer.~~ PXRD patterns were measured on Rigaku D/Max-2500 diffractometer with Cu target tube at 40 kV and 30 mA. Thermogravimetric analyses (TGA) were performed on Shanghai yinnuo 1000 B under  $\text{N}_2$  atmosphere at a heating rate of 10  $^\circ\text{C min}^{-1}$ . The sorption isotherms for  $\text{N}_2$  (77 K) and  $\text{CO}_2$  (298 K and 273 K) gas were measured with ASPS 2020 gas sorption analyzer. X-ray photoelectron spectroscopy (XPS) was carried out on a Thermo Fisher SCIENTIFIC using Al  $\text{K}\alpha$  X-ray source. Binding energies (BE) were calibrated by setting the measured BE of C 1s to 284.65 eV. Scanning electron microscope energy-dispersive X-ray spectroscopy (SEM-EDS) analyses were conducted on a JSM-7500F SEM equipped with an EDAX CDU leap detector. ICP-OES analysis was performed on PerkinElmer Optima 8000 Plasma Emission Spectrometer. GC analysis was performed on Agilent Technologies with 7890B GC system.

## 2. Crystal Structure Data of 1

**Table S1.** Crystal data and structure refinement parameters for **1**

| MOF Code                                           | <b>1</b>                                                                       |
|----------------------------------------------------|--------------------------------------------------------------------------------|
| Formula                                            | C <sub>86</sub> H <sub>70</sub> Ca <sub>3</sub> N <sub>4</sub> O <sub>16</sub> |
| Fw                                                 | 1536                                                                           |
| T/K                                                | 293(2)                                                                         |
| Crystal system                                     | triclinic                                                                      |
| Space group                                        | <i>P</i> -1                                                                    |
| <i>a</i> /Å                                        | 8.7338(5)                                                                      |
| <i>b</i> /Å                                        | 12.7784(9)                                                                     |
| <i>c</i> /Å                                        | 21.2690(19)                                                                    |
| $\alpha$ /°                                        | 73.111(7)                                                                      |
| $\beta$ /°                                         | 84.390(6)                                                                      |
| $\gamma$ /°                                        | 76.799(5)                                                                      |
| Volume/Å <sup>3</sup>                              | 2210.1(3)                                                                      |
| <i>Z</i>                                           | 1                                                                              |
| $\rho_{\text{calc}}$ /cm <sup>3</sup>              | 1.154                                                                          |
| $\mu$ /mm <sup>-1</sup>                            | 0.249                                                                          |
| <i>F</i> (000)                                     | 802.0                                                                          |
| Reflections collected                              | 18661                                                                          |
| Independent reflections                            | 9410                                                                           |
| Data/restraints/parameters                         | 9410/45/539                                                                    |
| <i>R</i> <sub>int</sub>                            | 0.0512                                                                         |
| Goodness-of-fit on <i>F</i> <sup>2</sup>           | 0.959                                                                          |
| <i>RI</i> , <i>wR2</i> [ <i>I</i> ≥2σ( <i>I</i> )] | 0.0906, 0.2329                                                                 |
| <i>RI</i> , <i>wR2</i> [all data]                  | 0.1374, 0.2637                                                                 |

**Table S2.** Selected bond lengths (Å) and bond Angles (°) for **1**.

| Bond length (Å) |          | Bond Angle (°) |            |
|-----------------|----------|----------------|------------|
| Ca1–O1          | 2.298(3) | O1–Ca1–O2      | 94.21(12)  |
| Ca1–O2          | 2.321(3) | O1–Ca1–O3      | 174.51(12) |
| Ca1–O3          | 2.398(3) | O1–Ca1–O4      | 133.43(11) |
| Ca1–O4          | 2.625(3) | O1–Ca1–O5      | 83.40(12)  |
| Ca1–O5          | 2.397(3) | O1–Ca1–O6      | 83.08(12)  |
| Ca1–O6          | 2.618(3) | O4–Ca2–Ca1     | 44.43(7)   |
| Ca1–O8          | 2.288(4) | O4–Ca2–O7      | 96.22(11)  |
| Ca2–O4          | 2.294(3) | O6–Ca2–Ca1     | 44.18(8)   |
| Ca2–O6          | 2.277(3) | O6–Ca2–O4      | 81.32(11)  |
| Ca2–O7          | 2.360(3) | C11–N1–C27     | 119.3(3)   |
| N1–C11          | 1.420(5) | C14–N1–C11     | 120.0(3)   |
| N1–C14          | 1.408(5) | C14–N1–C27     | 120.4(3)   |
| N1–C27          | 1.421(5) | O1–C1–O2       | 124.4(4)   |
| C1–C2           | 1.500(5) | O1–C1–C2       | 117.3(4)   |
| C3–C4           | 1.383(5) | O2–C1–C2       | 118.2(3)   |
| C5–C6           | 1.392(5) | C3–C2–C1       | 120.3(4)   |
| C8–C9           | 1.397(6) | C3–C2–C7       | 119.5(3)   |
| C10–C11         | 1.379(6) | C7–C2–C1       | 120.2(3)   |
| C12–C13         | 1.382(6) | C2–C3–C4       | 120.0(4)   |
| C14–C15         | 1.394(6) | C5–C4–C3       | 121.2(4)   |
| C16–C17         | 1.389(6) | C4–C5–C6       | 118.5(4)   |
| C17–C18         | 1.378(6) | C4–C5–C8       | 120.7(4)   |
| C20–C21         | 1.404(6) | C6–C5–C8       | 120.8(4)   |
| C21–C22         | 1.373(6) | C7–C6–C5       | 120.5(4)   |
| C23–C24         | 1.378(6) | C2–C7–C6       | 120.3(4)   |
| C24–C25         | 1.389(6) | C9–C8–C5       | 121.4(4)   |
| C27–C28         | 1.374(6) | C13–C8–C5      | 121.7(4)   |
| C29–C30         | 1.399(5) | C10–C9–C8      | 120.9(4)   |
| C30–C31         | 1.377(6) | C9–C10–C11     | 121.8(4)   |
| C31–C32         | 1.379(5) | C12–C11–C10    | 118.3(4)   |
| C34–C35         | 1.374(5) | C11–C12–C13    | 120.5(4)   |
| C36–C37         | 1.492(5) | C12–C13–C8     | 121.5(4)   |
| C38–C39         | 1.389(5) | C19–C14–C15    | 117.6(4)   |
| C39–C40         | 1.377(5) | C16–C15–C14    | 120.4(4)   |

Symmetry transformations used to generate equivalent atoms: <sup>1</sup>+X,-1+Y,1+Z; <sup>2</sup>1-X,-Y,2-Z; <sup>3</sup>1+X,+Y,1+Z; <sup>4</sup>2-X,1-Y,1-Z; <sup>5</sup>1+X,1+Y,+Z; <sup>6</sup>1-X,1-Y,-Z; <sup>7</sup>2-X,2-Y,-Z; <sup>1</sup>+X,-1+Y,1+Z; <sup>2</sup>1-X,-Y,2-Z; <sup>3</sup>1+X,+Y,1+Z; <sup>4</sup>2-X,1-Y,1-Z; <sup>5</sup>+X,1+Y,-1+Z; <sup>6</sup>1+X,1+Y,+Z; <sup>7</sup>1-X,1-Y,-Z; <sup>8</sup>2-X,2-Y,-Z; <sup>9</sup>-1+X,+Y,-1+Z; <sup>10</sup>-1+X,-1+Y,+Z

### 3. Physical Characterizations of 1

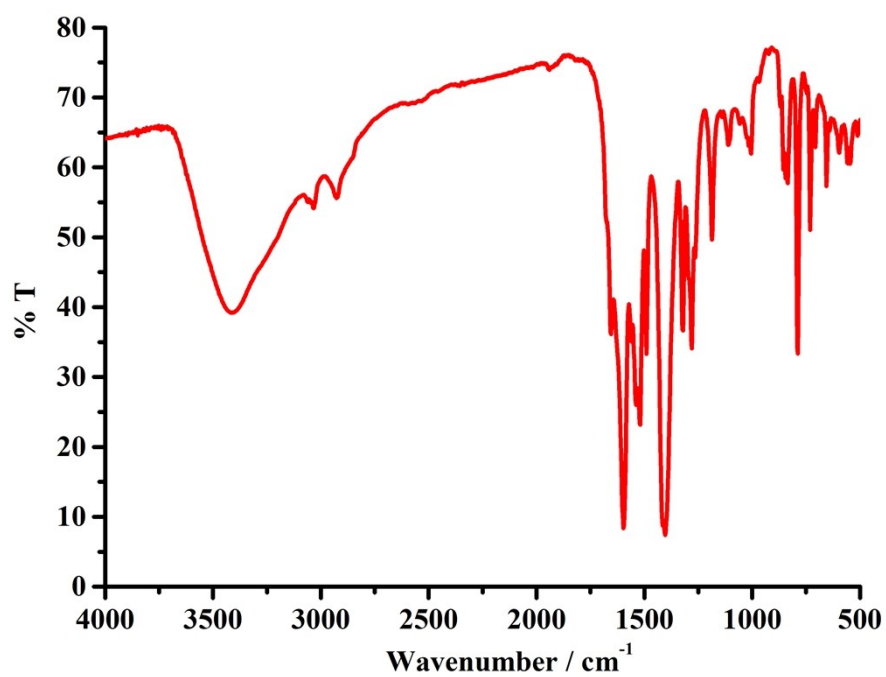

Figure S1. IR spectrum of 1

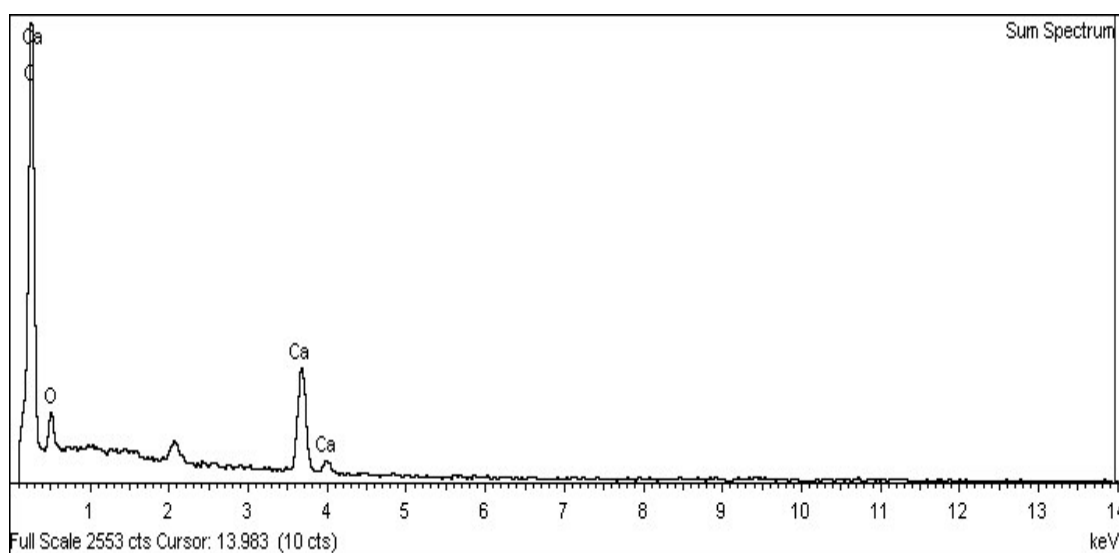

Figure S2. EDS spectrum of 1

#### 4. Stability Study of 1

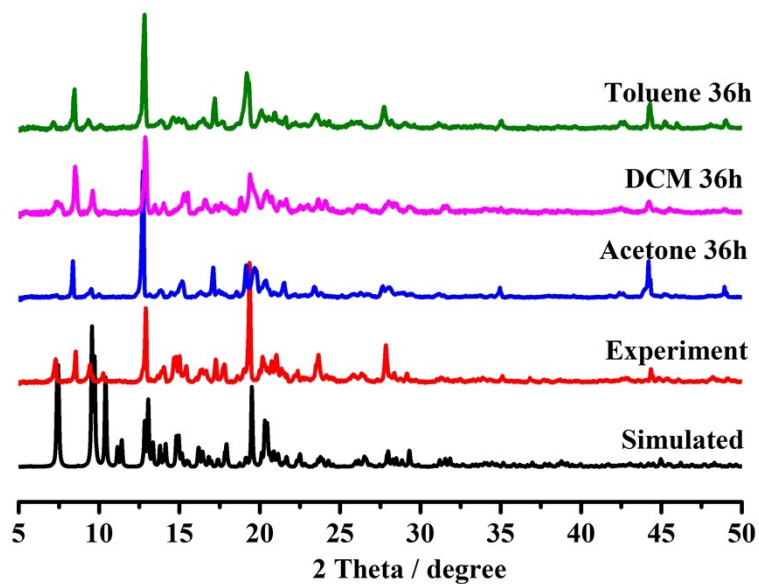

Figure S3. PXRD patterns of 1 upon treatment in different organic solvents for 36 h

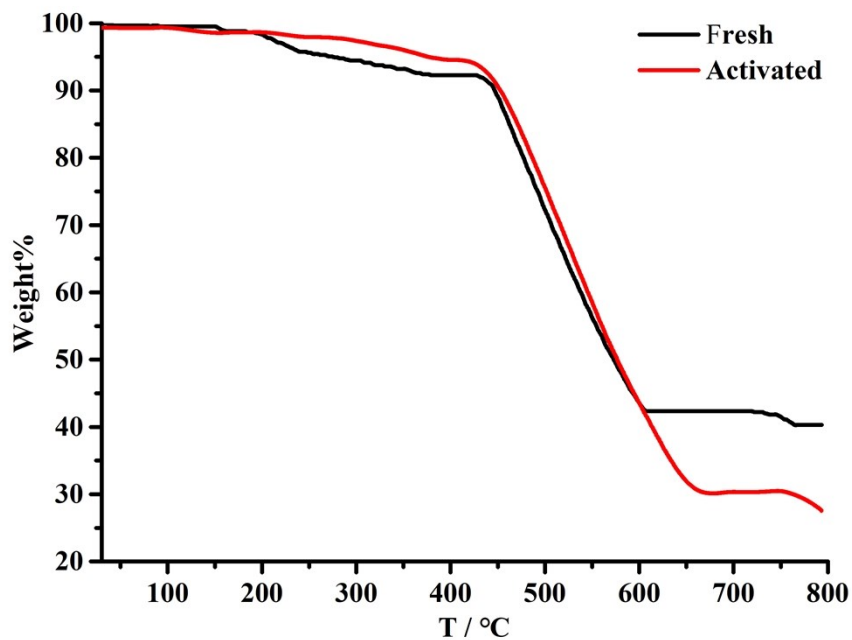

Figure S4. TG curves of fresh and activated 1 sample

## 5. Gas Adsorption of 1

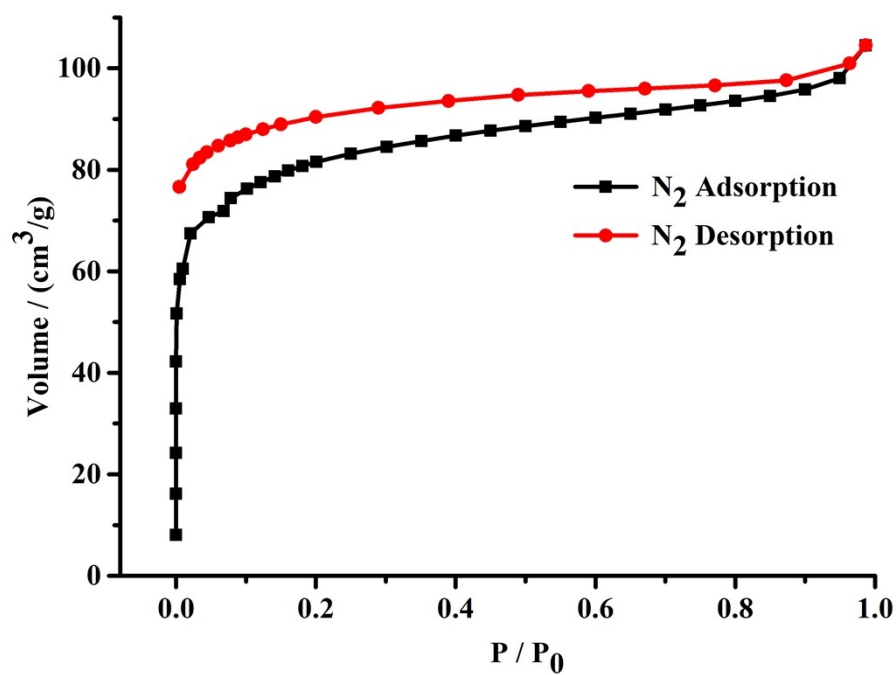

Figure S5. N<sub>2</sub> adsorption-desorption isotherms of 1 at 77K

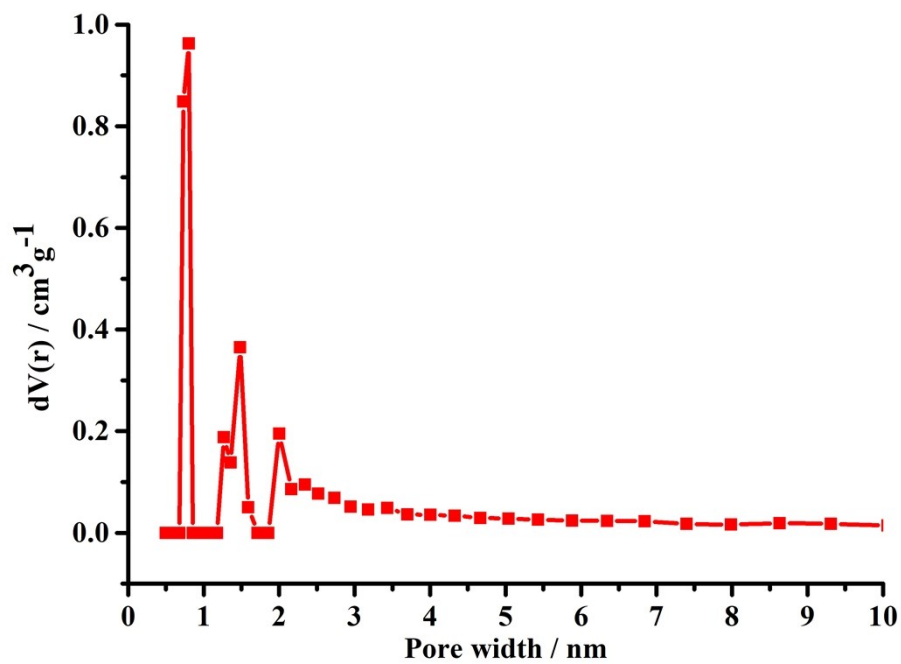

Figure S6. Density functional theory pore distribution plot of 1

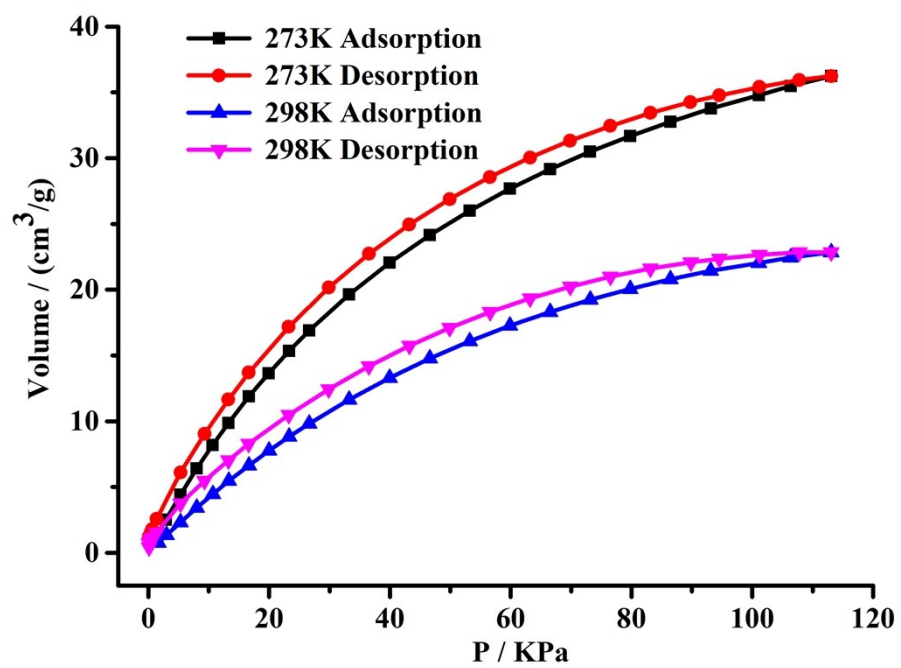

**Figure S7.** CO<sub>2</sub> adsorption-desorption isotherms of **1** at 273 and 298K



## 6. Catalytic Results

**Table S3.** Optimization of reaction condition for cyanosilylation of Aldehydes

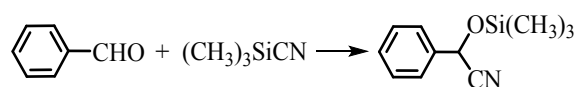

| Entry          | Molar Ratio of Reactants | Weight of <b>1</b> | Time | Yield <sup>a</sup> / % |
|----------------|--------------------------|--------------------|------|------------------------|
| 1 <sup>b</sup> | 1:1.2                    | 5 mg               | 10 h | 20                     |
| 2              | 1:1.2                    | 5 mg               | 12 h | 83                     |
| 3              | 1:1.2                    | 10 mg              | 12 h | 87                     |
| 4              | 1:2.0                    | 5 mg               | 6 h  | 99                     |
| 5 <sup>c</sup> | 1:2.0                    | 5 mg               | 3 h  | 86                     |
| 6 <sup>d</sup> | 1:2.0                    | 0 mg               | 6 h  | 12                     |
| 7 <sup>e</sup> | 1:2.0                    | 3 mg               | 6 h  | 99                     |
| 8 <sup>f</sup> | 1:2.0                    | 7 mg               | 6 h  | 50                     |
| 9 <sup>g</sup> | 1:2.0                    | 5 mg               | 6 h  | 6                      |

<sup>a</sup> Determined by <sup>1</sup>H NMR; <sup>b</sup> Took place in air, while the others under Ar; <sup>c</sup> In toluene; <sup>d</sup> Without any catalyst; <sup>e</sup> Ca(OAc)<sub>2</sub> (0.01 mmol) as catalyst; <sup>f</sup> H<sub>3</sub>TCBPA (0.01 mmol) as catalyst; <sup>g</sup> H<sub>3</sub>BTB (0.01 mmol) as catalyst.

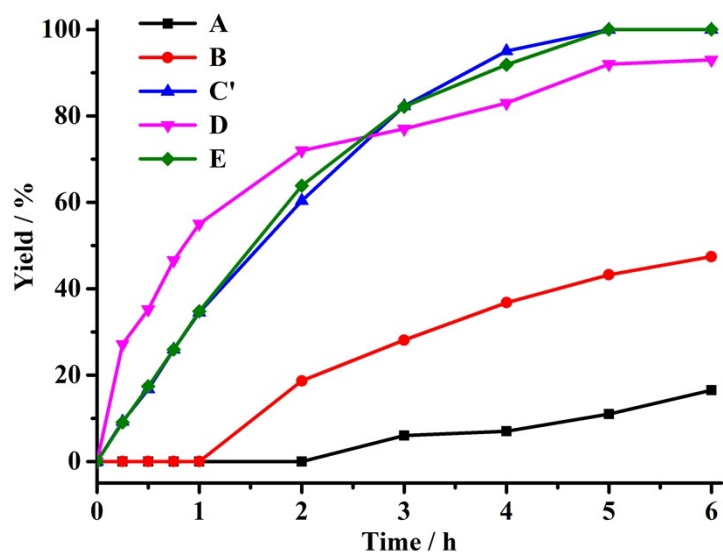

**Figure S8.** Time conversion plots for the optimization of reaction conditions. A, B, D, E corresponded to the same reaction conditions in Figure 2. In C' the ratio between benzaldehyde and  $(\text{CH}_3)_3\text{SiCN}$  was 1:2, while in C (Figure 2) was 1:1.2. Yields were determined by GC.

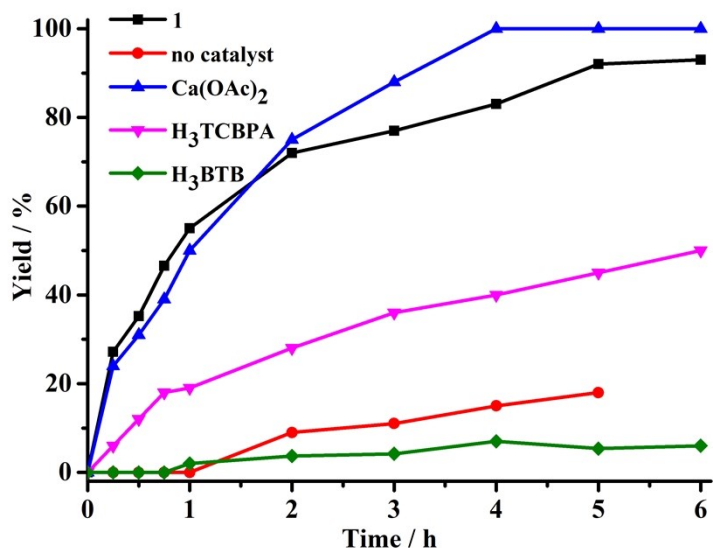

**Figure S9.** Time conversion plots for the comparison of **1**, without any catalyst,  $\text{Ca}(\text{OAc})_2$ ,  $\text{H}_3\text{TCBPA}$  and  $\text{H}_3\text{BTB}$ . Yields were determined by GC.

**Table S4.** Catalytic results of reported Lewis acid MOFs-based catalysts for cyanosilylation of aldehydes

| Entry | Catalyst and Loading                                                                                                                                           | Catalytic active site               | Temperature | Time | Yield | Ref. <sup>a</sup> |
|-------|----------------------------------------------------------------------------------------------------------------------------------------------------------------|-------------------------------------|-------------|------|-------|-------------------|
| 1     | Zn <sub>0.29</sub> -STU-2, 4 mol%                                                                                                                              | Mn <sup>2+</sup> , Zn <sup>2+</sup> | r.t.        | 12 h | 100 % | 43                |
| 2     | [(Cu <sub>4</sub> O <sub>0.27</sub> Cl <sub>0.73</sub> ) <sub>3</sub> (H <sub>0.5</sub> BTT) <sub>8</sub> ], 1 mol%                                            | Cu <sup>2+</sup>                    | 40 °C       | --   | 96 %  | 44                |
| 3     | BINAPDA-Zr-MOF, 1 mol%                                                                                                                                         | Zr <sup>4+</sup>                    | r.t.        | 5 h  | 45 %  | 30                |
| 4     | [Cd <sub>2</sub> (NiL <sup>1</sup> )(CdL <sup>2</sup> )] [Cd <sub>2</sub> (NiL <sup>1</sup> )(H <sub>2</sub> L <sup>2</sup> ) <sub>6</sub> DMF · 5MeOH, 1 mol% | Cd <sup>2+</sup> , Ni <sup>2+</sup> | r.t.        | 24 h | 95 %  | 45                |
| 5     | Ce-MDIP1, 2 mol%                                                                                                                                               | Ce <sup>3+</sup>                    | r.t.        | 24 h | 95 %  | 46                |
| 6     | 1 · Cd, 0.6 mol%                                                                                                                                               | Cd <sup>2+</sup>                    | r.t.        | 18 h | 94 %  | 47                |
| 7     | 1, 0.3 mol%                                                                                                                                                    | Ca <sup>2+</sup> , N                | r.t.        | 6 h  | 99%   | This work         |

<sup>a</sup> References in main text

**Table S5.** Recycling experiments for cyanosilylation of Aldehydes

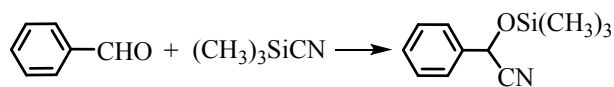

| Run | Yield (%) |
|-----|-----------|
| 1   | 99        |
| 2   | 99        |
| 3   | 99        |
| 4   | 99        |
| 5   | 99        |
| 6   | 99        |

**Table S6.** Catalytic results of reported MOFs-based catalysts for CO<sub>2</sub> addition to epoxides.

| Entry | Catalyst and Loading                                                                         | Cocatalyst | Pressure                   | Temperature | Time | Yield | Ref. <sup>a</sup> |
|-------|----------------------------------------------------------------------------------------------|------------|----------------------------|-------------|------|-------|-------------------|
| 1     | C <sub>54</sub> H <sub>56</sub> Mn <sub>4</sub> N <sub>6</sub> O <sub>2</sub><br>2 mol [Mn]% | TBAB       | 1 atm                      | 80 °C       | 8 h  | 99 %  | 49                |
| 2     | UiO-66-BAT<br>2 mol%                                                                         | TBAI       | 5 bar                      | 50 °C       | 6 h  | 95 %  | 50                |
| 3     | Gd-MOF<br>0.47 mol%                                                                          | TBAB       | 2 MPa                      | 80 °C       | 5 h  | 98 %  | 51                |
| 4     | 1<br>0.3 mol%                                                                                | TBAB       | CO <sub>2</sub><br>balloon | 100 °C      | 8 h  | 91 %  | This<br>work      |

<sup>a</sup> References in main text

## 7. Catalytic Procedure

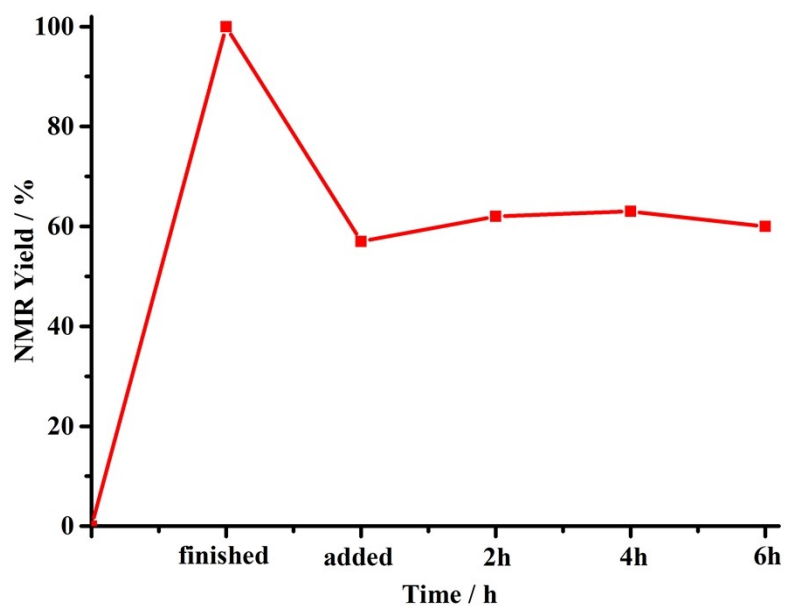

**Figure S10.** NMR Yields vs. Time in thermal filtration experiment of **1** in cyanosilylation of aldehydes

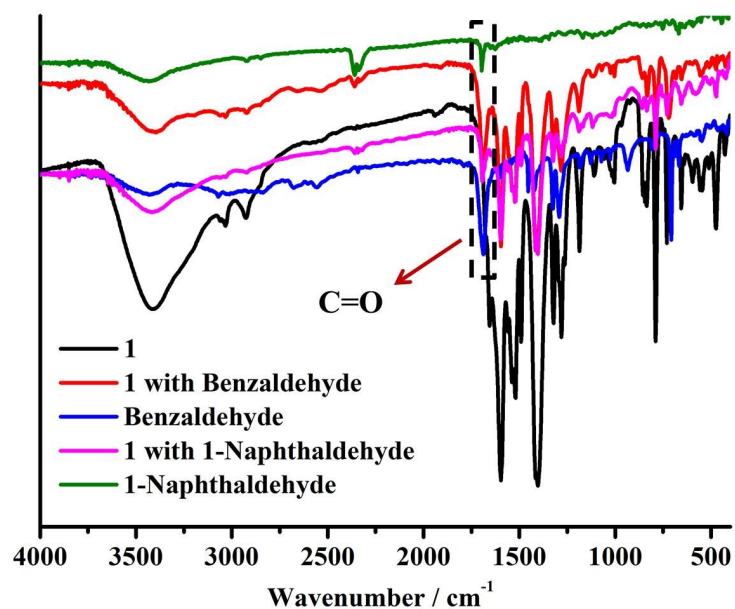

**Figure S11.** FT-IR of 1-naphthaldehyde, benzaldehyde, **1** and **1** after immersing in benzaldehyde or 1-naphthaldehyde solution for 24h

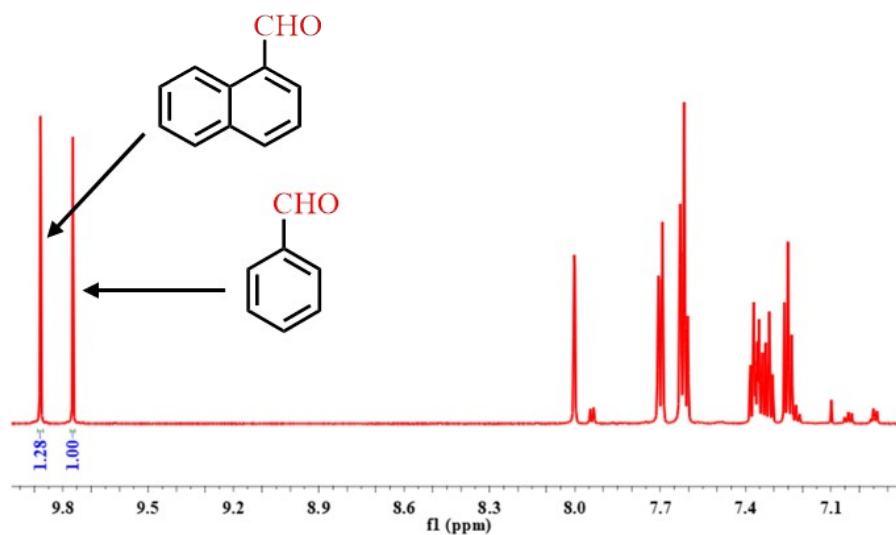

**Figure S12.** Mole ratio of benzaldehyde and 1-naphthaldehyde after stirring with **1** for 12 h

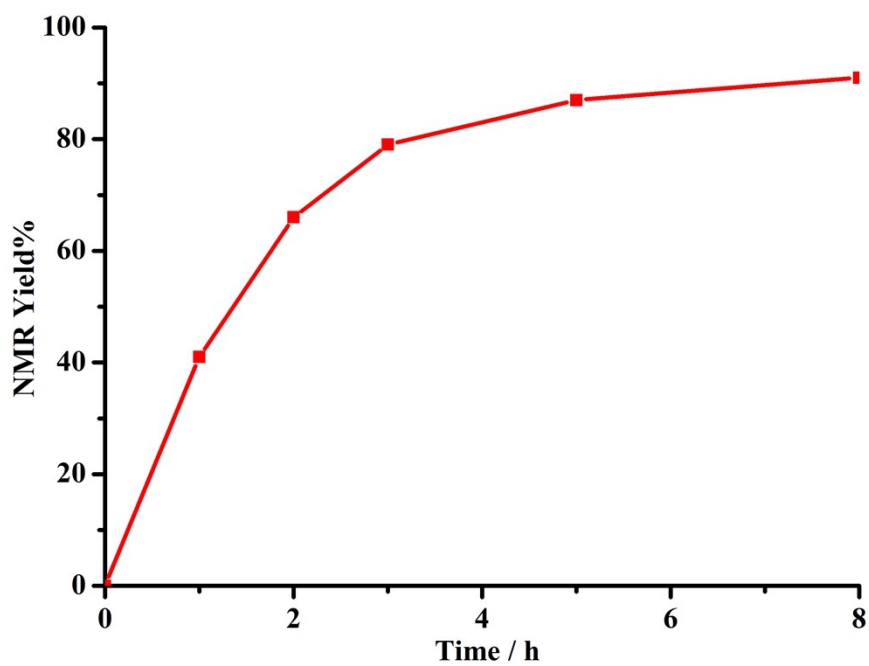

**Figure S13.** Time conversion plot of styrene oxide reacted with CO<sub>2</sub>. Yields were determined by <sup>1</sup>H NMR

## 8. Chemical stability of 1 during catalysis

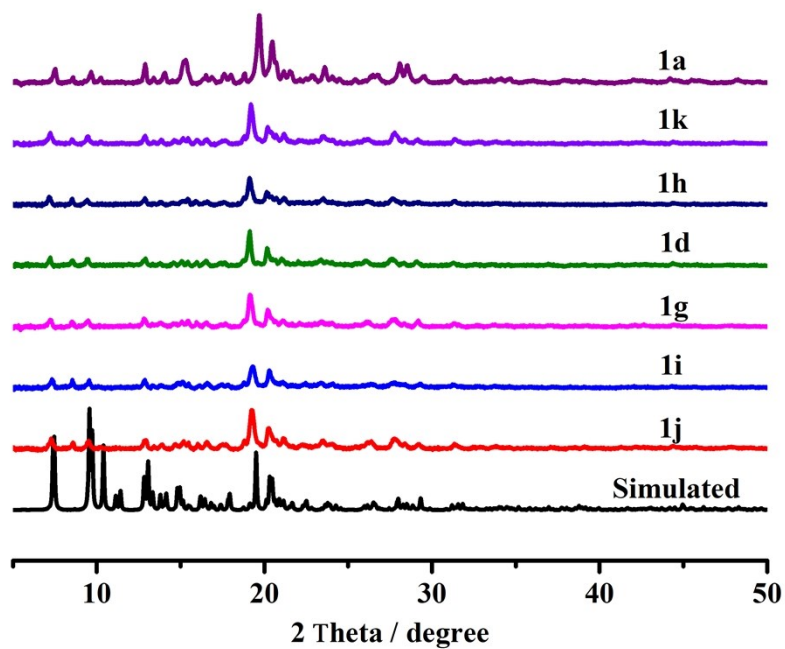

Figure S14. PXRD patterns of 1 after cyanosilylation of aldehydes

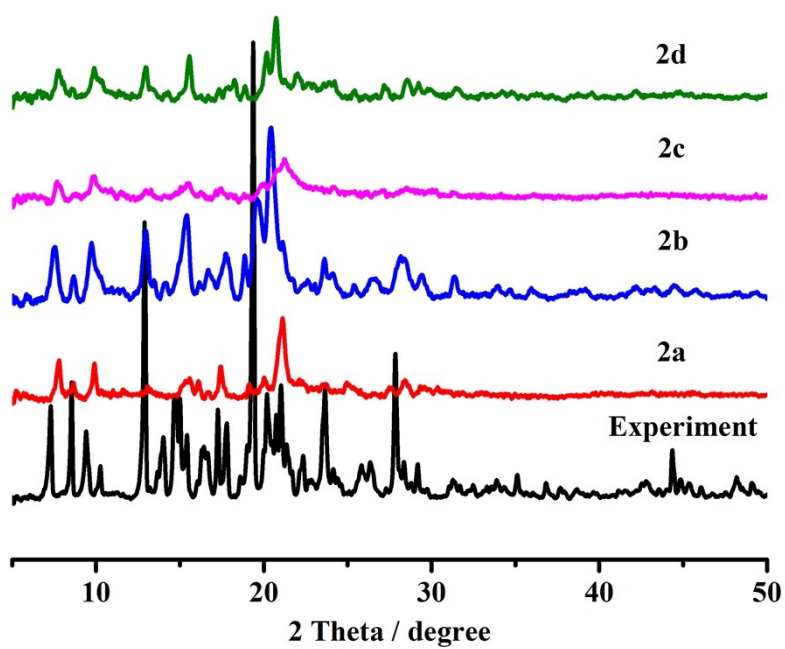

Figure S15. PXRD patterns of 1 before and after conversion of CO<sub>2</sub> with epoxides

## 9. Characterization of products

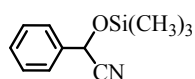

$^1\text{H}$  NMR (600 MHz,  $\text{CDCl}_3$ ) of **1a**:  $\delta$  7.48 (d, 2H,  $J = 7.4$  Hz), 7.43-7.36 (m, 3H), 5.51 (s, 1H), 0.24 (s, 9H). Consistent with reported values [*J. Am. Chem. Soc.*, 2014, **136**, 1746-1749]

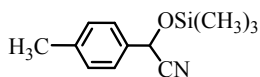

$^1\text{H}$  NMR (600 MHz,  $\text{CDCl}_3$ ) of **1b**:  $\delta$  7.26 (d, 2H,  $J = 8.0$  Hz), 7.09 (d, 2H,  $J = 8.2$  Hz), 5.37 (s, 1H), 2.24 (s, 3H), 0.12 (d, 9H,  $J = 0.9$  Hz). Consistent with reported values [*Inorg. Chem.*, 2017, **56**, 3036-3043].

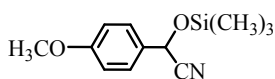

$^1\text{H}$  NMR (600 MHz,  $\text{CDCl}_3$ ) of **1c**:  $\delta$  7.37 (d, 2H,  $J=8.7$ ), 6.90 (d, 2H,  $J=8.8$ ), 5.43 (s, 1H), 3.76 (s, 3H), 0.19 (s, 9H). Consistent with reported values [*Inorg. Chem.*, 2017, **56**, 3036-3043].

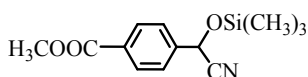

$^1\text{H}$  NMR (600 MHz,  $\text{CDCl}_3$ ) of **1d**:  $\delta$  7.99 (d, 2H,  $J=8.4$ ), 7.48 (d, 2H,  $J=8.2$ ), 5.52 (s, 1H), 3.83 (s, 3H), 0.17 (s, 9H).  $^{13}\text{C}$  NMR (151 MHz,  $\text{CDCl}_3$ ):  $\delta$  -0.30, 53.65, 63.31, 126.35, 127.22, 130.28, 131.26, 141.03, 166.41.

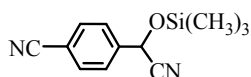

$^1\text{H}$  NMR (600 MHz,  $\text{CDCl}_3$ ) of **1e**:  $\delta$  7.64 (d, 2H,  $J=8.4$ ), 7.55 (d, 2H,  $J=8.2$ ), 5.55 (s, 1H), 0.19 (s, 9H). Consistent with reported values [*Inorg. Chem.*, 2017, **56**, 3036-3043].  $^{13}\text{C}$  NMR (151 MHz,  $\text{CDCl}_3$ ):  $\delta$  -0.23, 62.95, 113.43, 127.01, 132.88, 141.31.

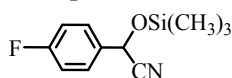

$^1\text{H}$  NMR (600 MHz,  $\text{CDCl}_3$ ) of **1f**:  $\delta$  7.46-7.41 (m, 2H), 7.09-7.03 (m, 2H), 5.47 (s, 1H), 0.20 (s, 9H).  $^{13}\text{C}$  NMR (151 MHz,  $\text{CDCl}_3$ ):  $\delta$  -0.17, 63.14, 116.16, 128.46, 132.48, 162.48, 164.12.

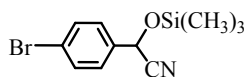

$^1\text{H}$  NMR (600 MHz,  $\text{CDCl}_3$ ) of **1g**:  $\delta$  7.50-7.47 (m, 2H), 7.33-7.29 (m, 2H), 5.44 (s, 1H), 0.19 (s, 9H). Consistent with reported values [*J. Am. Chem. Soc.*, 2014, **136**, 1746-1749]

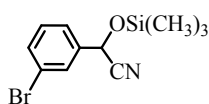



$^1\text{H}$  NMR (600 MHz,  $\text{CDCl}_3$ ) of **1h**:  $\delta$  7.58 (t, 1H,  $J=1.7$ ), 7.46-7.44 (dd, 1H,  $J=7.5$ , 1.2), 7.34-7.36 (m, 1H), 7.24-7.23 (t, 1H,  $J=7.9$ ), 5.45 (s, 1H), 0.19 (s, 9H). Consistent with reported values [*Synlett*, 2011, **4**, 551-554]

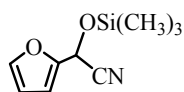

$^1\text{H}$  NMR (600 MHz,  $\text{CDCl}_3$ ) of **1i**:  $\delta$  7.40 (dd, 1H,  $J=1.8$ , 0.8), 6.48 (d, 1H,  $J=3.3$ ), 6.34 (dd, 1H,  $J=3.3$ , 1.9), 5.51 (s, 1H), 0.14 (s, 9H). Consistent with reported values [*J. Am. Chem. Soc.*, 2014, **136**, 1746-1749]

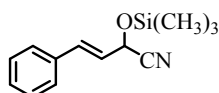

$^1\text{H}$  NMR (600 MHz,  $\text{CDCl}_3$ ) of **1j**:  $\delta$  7.28 (d, 2H,  $J=7.3$ ), 7.23 (t, 2H,  $J=7.4$ ), 7.20-7.17 (m, 1H), 6.69 (d, 1H,  $J=15.7$ ), 6.07 (dd, 1H,  $J=15.8$ , 6.0), 5.00 (dd, 1H,  $J=6.0$ , 1.3), 0.15 (s, 9H). Consistent with reported values [*J. Am. Chem. Soc.*, 2014, **136**, 1746-1749]

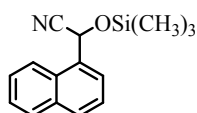

$^1\text{H}$  NMR (600 MHz,  $\text{CDCl}_3$ ) of **1k**:  $\delta$  7.95 (s, 1H), 7.89-7.82 (m, 3H), 7.58 (dd, 1H,  $J=8.5$ , 1.8), 7.54-7.50 (m, 2H), 5.68 (s, 1H), 0.29 (s, 9H). Consistent with reported values [*J. Am. Chem. Soc.*, 2014, **136**, 1746-1749]

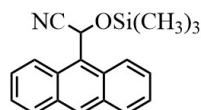

$^1\text{H}$  NMR (600 MHz,  $\text{CDCl}_3$ ) of **1l**:  $\delta$  8.41 (d,  $J = 8.9$  Hz, 2H), 8.18 (s, 1H), 7.73 (d,  $J = 8.4$  Hz, 2H), 7.44 (ddd,  $J = 8.9$ , 6.5, 1.2 Hz, 2H), 7.28 (dd,  $J = 7.9$ , 7.0 Hz, 2H), 6.87 (s, 1H), 0.00 (s, 9H). Consistent with reported values [*J. Am. Chem. Soc.*, 2014, **136**, 1746-1749].  $^{13}\text{C}$  NMR (151 MHz,  $\text{CDCl}_3$ ):  $\delta$  -0.07, 58.21, 123.63, 125.33, 126.05, 127.30, 129.50, 129.59, 130.68, 131.55.

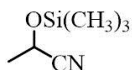

$^1\text{H}$  NMR (600 MHz,  $\text{CDCl}_3$ ) of **1m**:  $\delta$  4.49 (q,  $J = 6.7$ , 1H), 1.49 (d,  $J = 6.7$ , 3H), 0.16 (s, 9H).  $^{13}\text{C}$  NMR (151 MHz,  $\text{CDCl}_3$ ):  $\delta$  -0.31, 23.11, 57.37, 127.14.

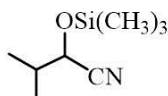

$^1\text{H}$  NMR (600 MHz,  $\text{CDCl}_3$ ) of **1n**:  $\delta$  4.13 (d,  $J = 5.8$ , 1H), 2.01-1.85 (m, 1H), 1.00 (d,  $J = 6.7$ , 3H), 0.97 (d,  $J = 6.8$ , 3H), 0.16 (s, 9H).  $^{13}\text{C}$  NMR (151 MHz,  $\text{CDCl}_3$ ):  $\delta$  -0.33, 17.39, 17.71, 34.00, 67.38, 127.22.

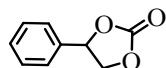

$^1\text{H}$  NMR (600 MHz,  $\text{CDCl}_3$ ) of **2a**:  $\delta$  7.41 (m, 3H), 7.37-7.31 (m, 2H), 5.71-5.62 (m, 1H), 4.84-4.73 (m, 1H), 4.36-4.24 (m, 1H). Consistent with reported values [*Applied Catalysis B: Environmental*, 2019, **254**, 380-390].

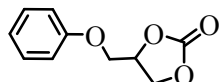

$^1\text{H}$  NMR (600 MHz,  $\text{CDCl}_3$ ) of **2b**:  $\delta$  7.23-7.18 (m, 2H), 6.91 (td,  $J=7.4, 0.9$ , 1H), 6.83-6.80 (m, 2H), 4.94 (ddt,  $J=6.8, 6.0, 3.5$ , 1H), 4.49 (t,  $J=8.5$ , 1H), 4.40 (dd,  $J=8.6, 5.9$ , 1H), 4.13 (dd,  $J=10.9, 3.3$ , 1H), 4.00 (dd,  $J=10.9, 3.6$ , 1H).  $^{13}\text{C}$  NMR (151 MHz,  $\text{CDCl}_3$ ):  $\delta$  66.26, 67.01, 74.47, 114.68, 121.90, 129.69, 155.00, 157.00. Consistent with reported values [*Applied Catalysis B: Environmental*, 2019, **254**, 380-390].

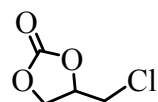

$^1\text{H}$  NMR (600 MHz,  $\text{CDCl}_3$ ) of **2c**:  $\delta$  4.96 (td,  $J=8.7, 5.2$ , 1H), 4.59-4.50 (m, 1H), 4.39-4.30 (m, 1H), 3.66-3.59 (m, 2H). Consistent with reported values [*Dalton Trans.*, 2019, **48**, 7612-7618].

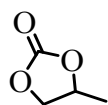

$^1\text{H}$  NMR (600 MHz,  $\text{CDCl}_3$ ) of **2d**:  $\delta$  4.86-4.77 (m, 1H), 4.51 (t,  $J=8.1$ , 1H), 3.97 (t,  $J=7.8$ , 1H), 1.45-1.43 (m, 3H). Consistent with reported values [*Applied Catalysis B: Environmental*, 2019, **254**, 380-390].

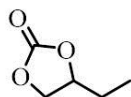

$^1\text{H}$  NMR (600 MHz,  $\text{CDCl}_3$ ) of **2e**:  $\delta$  4.61 (m, 1H), 4.48 (t,  $J=8.2$ , 1H), 4.03 (dd,  $J=8.4, 7.0$ , 1H), 1.80-1.66 (m, 2H), 0.97 (t,  $J=7.4$ , 3H). Consistent with reported values [*Dalton Trans.*, 2019, **48**, 7612-7618].

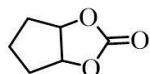

$^1\text{H}$  NMR (600 MHz,  $\text{CDCl}_3$ ) of **2f**:  $\delta$  5.10-5.06 (m, 2H), 2.11 (ddd,  $J=7.0, 5.0, 1.4$ , 2H), 1.83-1.69 (m, 4H). Consistent with reported values [*Applied Catalysis B: Environmental*, 2019, **254**, 380-390].

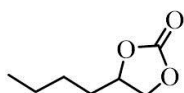

$^1\text{H}$  NMR (600 MHz,  $\text{CDCl}_3$ ) of **2g**:  $\delta$  4.62-4.59 (m, 1H), 4.45-4.41 (m, 1H), 3.98-3.94

(m, 1H), 1.70-1.66 (m, 1H), 1.61-1.56 (m, 1H), 1.42-1.29 (m, 4H) 0.82-0.77 (m, 3H).  
Consistent with reported values [*Chem. Lett.*, 2017, **46**, 968-969].
